# Supplementary figures and images for: Shear-mediated orientational mineralization of bone apatite on collagen fibrils
Source: Royal Society of Chemistry journal article supplement (doi:10.1039/c7tb02223a), 2017-01-01

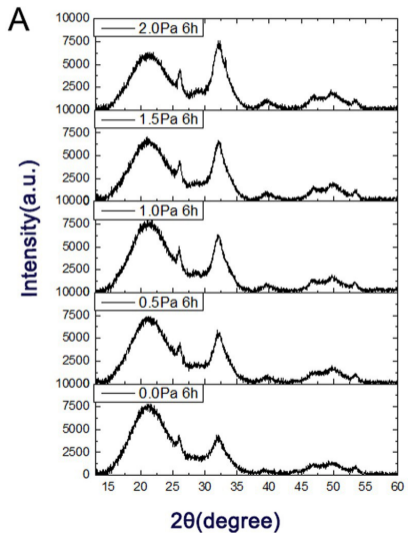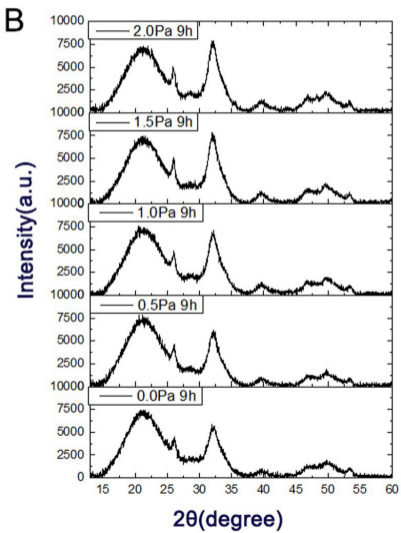

Supplement: c7tb02223a1.pdf [file c7tb02223a1.pdf]
